# Supplementary material
Source: PubMed Central journal article supplement (PMC2593920)

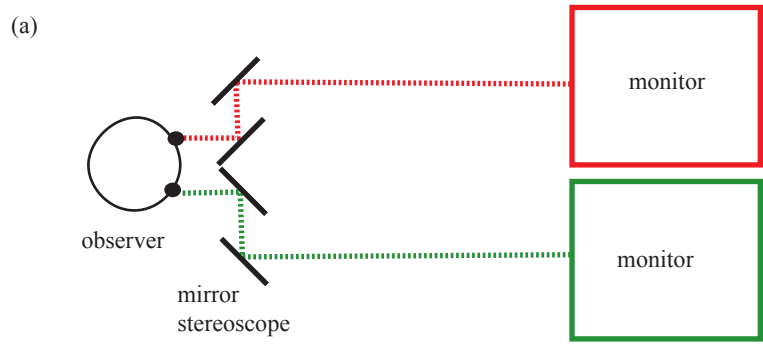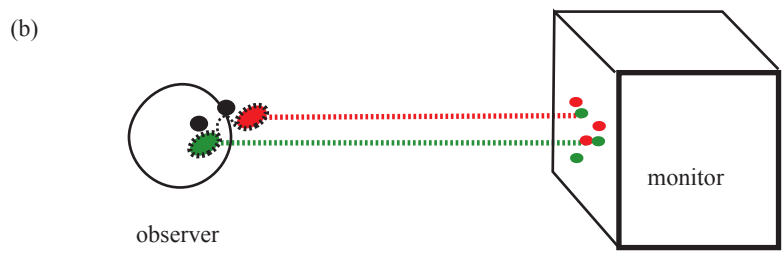

Supplement: rspb20080043s04.pdf [file rspb20080043s04.pdf]

(a) all control participants

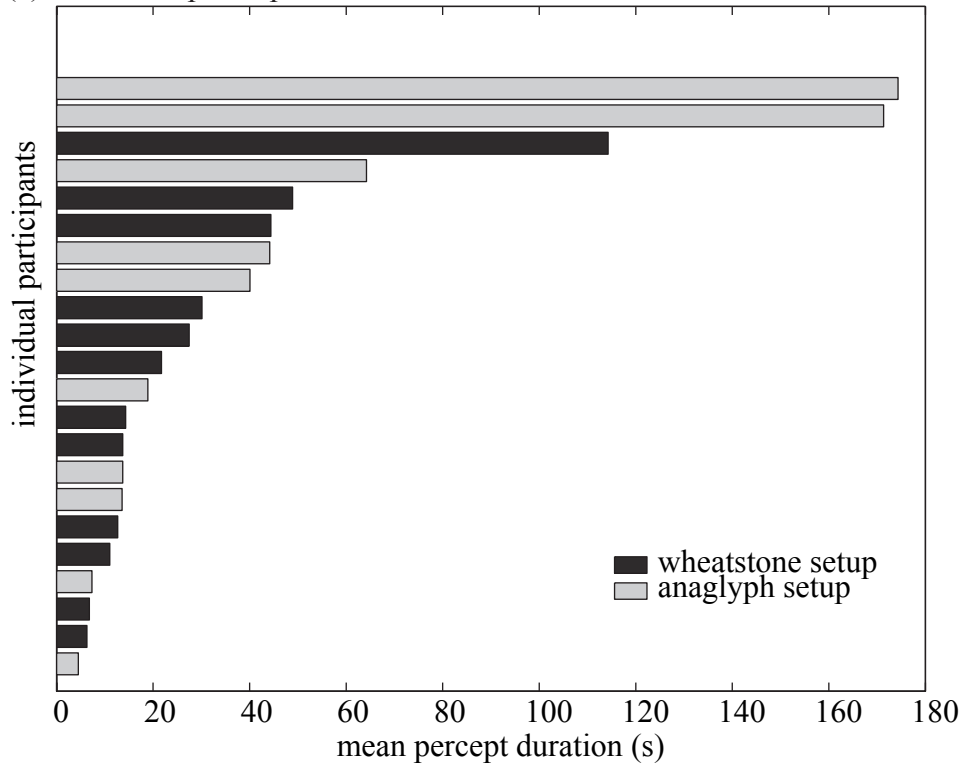

(b) control participants  $\geq 75\%$  correct for catch events

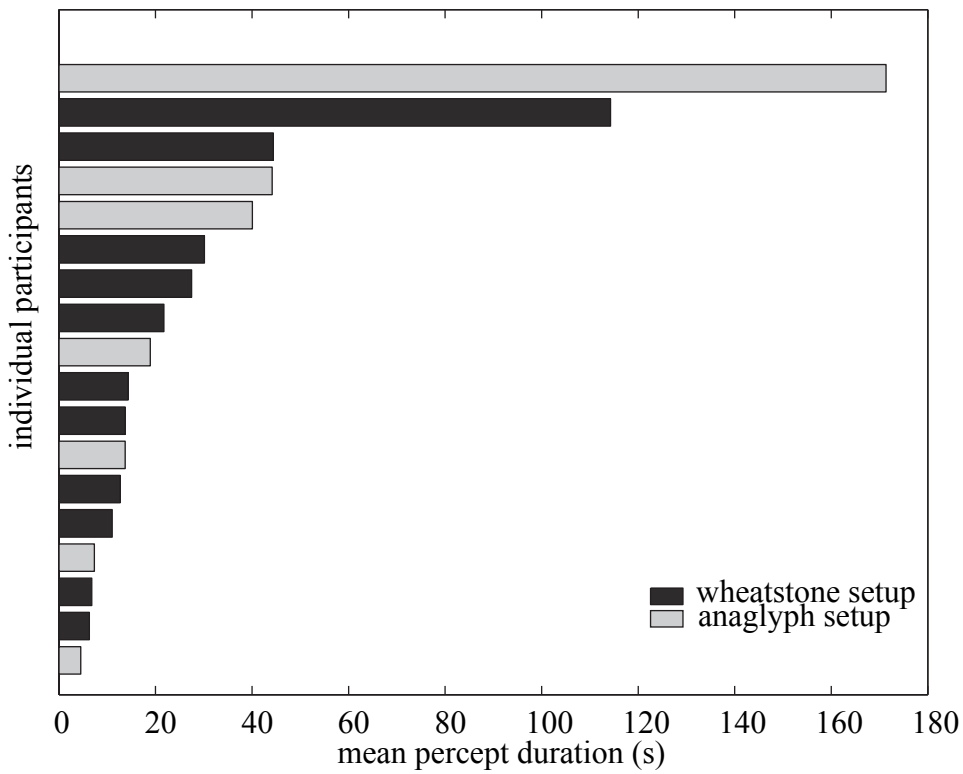

Supplement: rspb20080043s05.pdf [file rspb20080043s05.pdf]

(a) Gamma-rate

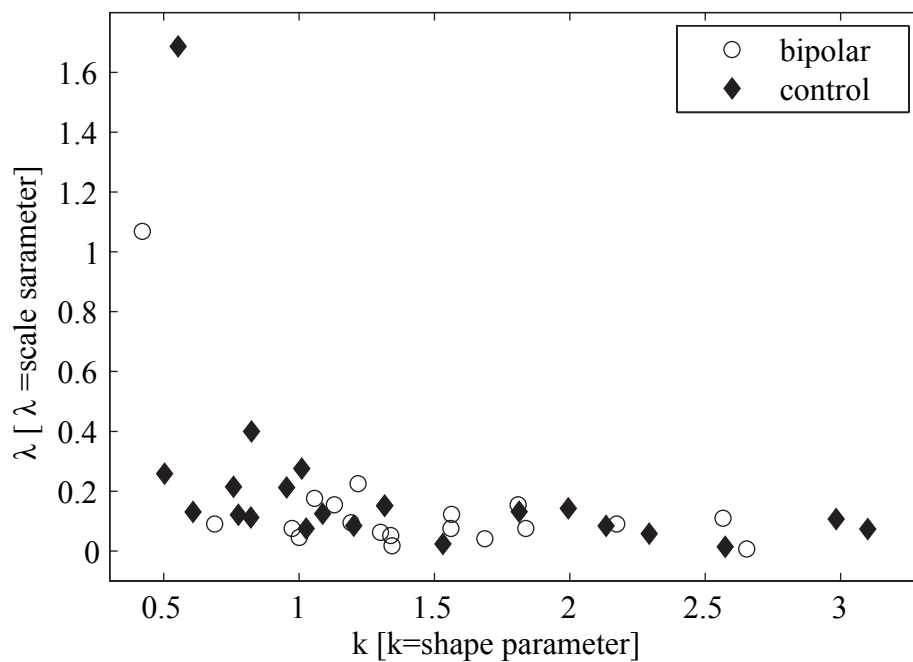

(b) Gamma

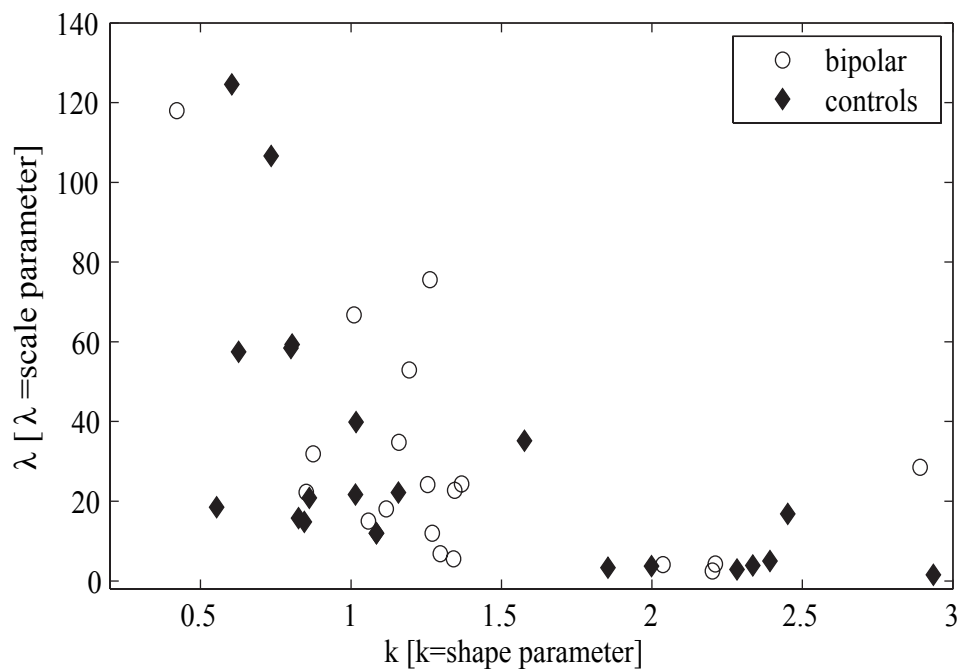

Supplement: rspb20080043s06.pdf [file rspb20080043s06.pdf]

participants with 75% or more of catch events correct

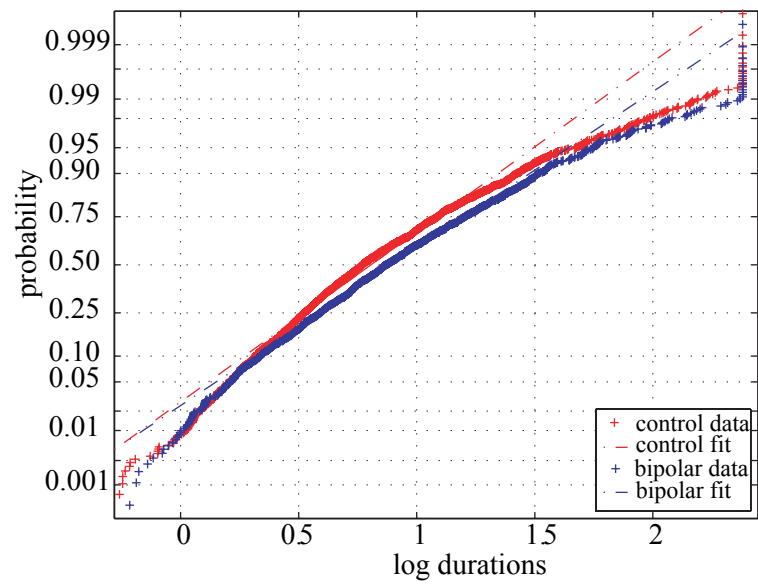

Supplement: rspb20080043s07.pdf [file rspb20080043s07.pdf]
